## Acknowledgment of Reviewers

The Editors of *Demography* depend on the judgment of outside reviewers in selecting manuscripts for publication. We thank our many colleagues for their thoughtful and professional contributions to this process. Their constructive criticism is essential in supporting authors during manuscript revision. The following persons served as peer reviewers during the period September 1, 2020, to August 31, 2021.

|                          |                       |                       |
|--------------------------|-----------------------|-----------------------|
| José Manuel Aburto       | Eileen Avery          | Jason D. Boardman     |
| Francesco Acciai         | Imran Aziz            | Petri Böckerman       |
| jimi adams               | Michael D. M. Bader   | Adebiyi Germain Boco  |
| Fenaba Addo              | Bernard Baffour       | Courtney E. Boen      |
| Victor Agadjanian        | Regina S. Baker       | Diederik Boertien     |
| Philipp Ager             | Nicoletta Balbo       | Thijs Bol             |
| Emily M. Agree           | Sarah H. Bana         | David Brady           |
| Jennifer Ailshire        | Bilal Barakat         | Lars Brännström       |
| Kehinde F. Ajayi         | Anna Baranowska-Rataj | Sarah R. Brauner-Otto |
| Igor Akushevich          | Nicola Barban         | Noli Brazil           |
| Francisco Alba           | Jennifer S. Barber    | Robert V. Breunig     |
| Richard Alba             | Kieron J. Barclay     | Dustin C. Brown       |
| Diego Alburez-Gutierrez  | Alan Barreca          | Ryan Brown            |
| Monica Alexander         | Ugo Filippo Basellini | Susan L. Brown        |
| Juha M. Alho             | Jacob Bastian         | Tyson H. Brown        |
| Keera Allendorf          | Shawn Bauldry         | Tim Bruckner          |
| Douglas Almond           | Brian Beach           | Kasey Buckles         |
| Onur Altindag            | Frank Bean            | Michelle J. Budig     |
| Steven E. Alvarado       | Jonathan M. Bearak    | Xiana Bueno           |
| Jesus-Adrian Alvarez     | Eva Beaujouan         | Gary Burtless         |
| Duane F. Alwin           | Kelly Bedard          | Thomas Byrne          |
| Vikesh Amin              | Julia Andrea Behrman  | Tania Cabello-Hutt    |
| Hans S. Andersen         | Andrew Bell           | Yong Cai              |
| Gunnar Andersson         | Marie-Pier            | Cameron D. Campbell   |
| Kirill F. Andreev        | Bergeron-Boucher      | Jennifer Candipan     |
| Philip Anglewicz         | Ann M. Berrington     | Phillip A. Cantu      |
| Marco Angrisani          | Brent M. Berry        | Vladimir Canudas-Romo |
| Anne Sofie Tegner Anker  | Ann E. Biddlecom      | Jorgen Carling        |
| Elizabeth Arias          | Ariel J. Binder       | Elwood D. Carlson     |
| Bruno Arpino             | Kendra Bischoff       | Marcia J. Carlson     |
| Stephanie Arteaga        | Shelah S. Bloom       | Monica Carney         |
| Shervin Assari           | Deirdre Bloome        | Christopher Carpenter |
| Jennifer March Augustine | John Blosnich         | Emma Carpenter        |

|                          |                        |                        |
|--------------------------|------------------------|------------------------|
| Danielle Casarez Lemi    | Jack DeWaard           | Ryan Finnigan          |
| Michele Casper           | Viorela Diaconu        | Lee Fiorio             |
| John B. Casterline       | Christina J. Diaz      | Hayley Fisher          |
| Peter Catron             | Martin Diewald         | Veronique Flambard     |
| Cristina Cattaneo        | Benjamin Domingue      | Jason Fletcher         |
| Monica Caudillo          | Premchand Dommaraju    | Chenoa A. Flippen      |
| Shannon E. Cavanagh      | Molly Dondero          | Paula Fomby            |
| Nina L. Cesare           | Hao Dong               | Thomas Bradley Foster  |
| Sophia Chae              | Xiao-yuan Dong         | Didier Fouarge         |
| Cynthia Chen             | Audrey Dorelien        | Kenneth Frank          |
| Kelly Chen               | Catherine Doren        | Reanne Frank           |
| Yen-hsin Alice Cheng     | Jennifer Beam Dowd     | Elizabeth Frankenberg  |
| Juanita Chinn            | Douglas Downey         | Adrienne Frech         |
| Chi-Tsun Chiu            | Anne K. Driscoll       | Esther M. Friedman     |
| Hyunkuk Cho              | Sonja Drobnič          | Samantha R. Friedman   |
| Kate H. Choi             | Allison Dunatchik      | Paul Frijters          |
| Seongsoo Choi            | Rachel Dunifon         | Wolfgang Frimmel       |
| Vincent Chua             | Omer Bahadir Dursun    | Qiang Fu               |
| Andrew E. Clark          | Rachel E. Dwyer        | Delia Furtado          |
| Samuel J. Clark          | Laura Dwyer-Lindgren   | Elizabeth Fussell      |
| Michael Cline            | Dalkhat M. Ediev       | Ryan Gabriel           |
| Philip N. Cohen          | Jeffrey David Edmeades | Catherine Garcia       |
| Cynthia G. Colen         | Ryan D. Edwards        | Jenny Garcia           |
| Caitlyn Collins          | Mieke C. W. Eeckhaut   | Manuel García y Griego |
| Chiara Ludovica Comolli  | Elizabeth Jane Ela     | Ginny Garcia-Alexander |
| D' Lane Compton          | James R. Elliott       | Filiz Garip            |
| Dalton Conley            | Mark Ellis             | Anna Gassman-Pines     |
| Dylan Connor             | Irma T. Elo            | Robin Gauthier         |
| Kerith Jane Conron       | Michal Engelman        | Lauren Gaydosh         |
| Jordan A. Conwell        | Barbara Entwisle       | Katie R. Genadek       |
| C. Justin Cook           | Björn Eriksson         | Arline T. Geronimus    |
| Steven T. Cook           | Michael H. Esposito    | Dora Gicheva           |
| Margaret Michele Gough   | Albert Esteve          | Stuart Gietel-Basten   |
| Courtney                 | Bethany Everett        | Donna K. Ginther       |
| Mark E. Courtney         | Toni Falbo             | Jessica D. Gipson      |
| Christina Jeanette Cross | Peter Fallesen         | Osea Giuntella         |
| Kyle Crowder             | Bruce Fallick          | Rebecca Glauber        |
| Sara R. Curran           | Wen Fan                | Jennifer E. Glick      |
| Marah A. Curtis          | Mateo Farina           | Anu Manchikanti Gómez  |
| David Cutler             | Griffith Feeney        | Pilar Gonalons-Pons    |
| Sarah Damaske            | Justin Michael Feldman | Devon Gorry            |
| Damien de Walque         | Tropf Christian Felix  | Kimberly A. Goyette    |
| Daniela Del Boca         | Andrew Fenelon         | Corina Graif           |
| Patrick Denice           | Jeremy E. Fiel         | Monica J. Grant        |
| Justin T. Denney         | Jason M. Fields        | Michael Grätz          |
| Laurie Fields DeRose     | Brian Karl Finch       | Arthur L. Greil        |
| Sonalde B. Desai         | Lawrence B. Finer      | Kathleen Griesbach     |

|                         |                      |                        |
|-------------------------|----------------------|------------------------|
| Angelina Grigoryeva     | Rozana Himaz         | Mark A. Klee           |
| Eric Grodsky            | Jessica Y. Ho        | Jennifer Klein         |
| Tal Gross               | Alex Hollingsworth   | Rachel Garshick Kleit  |
| Emily Grundy            | Anders Holm          | Roger Koenker          |
| Zoya Gubernskaya        | Charles Yuji Horioka | Hans-Peter Kohler      |
| Raffaele Guetto         | Jason N. Houle       | Martin Kolk            |
| Michel Guillot          | Junia Howell         | Kamila Kolpashnikova   |
| Christophe Z. Guilmoto  | Ning Hsieh           | Zovanga Louis Kone     |
| Melanie Guldi           | Mengyao Hu           | Edward Kong            |
| Selim Gulesci           | Shu Hu               | Sabino Kornrich        |
| Aaron Gullickson        | Yang Hu              | Tanya Koropecykj-Cox   |
| Craig Gundersen         | Wei Huang            | Kathryn Kost           |
| Karen Benjamin Guzzo    | Ying Huang           | Renee Kramer           |
| Steven A. Haas          | Henry Hyatt          | Rory Kramer            |
| J. David Hacker         | Rob J. Hyndman       | Øystein Kravdal        |
| Johannes Hagen          | John D. Iceland      | Rose Kreider           |
| Jo Mhairi Hale          | Roberto Impicciatore | Martin Kreidl          |
| Matthew Hall            | Patrick Ishizuka     | Christian Krekel       |
| Sarah Halpern-Meekin    | Tongyai Iyavarakul   | Michaela R. Kreyenfeld |
| Ted Hamann              | Margot Jackson       | Cornelia Kristen       |
| Jenifer Hamil-Luker     | Paul A. Jargowsky    | Yana A. Kucheva        |
| Erin R. Hamilton        | Dmitri A. Jdanov     | Hill Kulu              |
| Mats Hammarstedt        | Eric Brandon Jensen  | Janet Chen-Lan Kuo     |
| Bernhard Hammer         | Nan Jiang            | Arielle Kuperberg      |
| Jeehoon Han             | Xuan Jiang           | Bongoh Kye             |
| Mark S. Handcock        | Sasha Shen Johfre    | Joe LaBriola           |
| Karsten Hank            | Jennifer A.          | Karyn Lacy             |
| Lingxin Hao             | Johnson-Hanks        | Danya Lagos            |
| Jessica Halliday Hardie | Shareen Joshi        | Kenneth C. Land        |
| Bradley Hardy           | Jan Kabatek          | Joseph T. Lariscy      |
| Taylor Hargrove         | Sanna                | Agustina Laurito       |
| Kristen Harknett        | Kailaheimo-Lönnqvist | Volha Lazuka           |
| Juho Härkönen           | Guyonne Kalb         | Douglas Ryan Leasure   |
| Sam Harper              | Matthijs Kalmijn     | Haena Lee              |
| Caroline Sten Hartnett  | Nicole Kapelle       | Hyojung Lee            |
| Orestes P. Hastings     | Ridhi Kashyap        | Sangsoo Lee            |
| Mathew Hauer            | Megan L. Kavanaugh   | Lei Lei                |
| Andreas Haupt           | Melissa Schettini    | Christine Leibbrand    |
| Sarah R. Hayford        | Kearney              | Michael Lens           |
| Derek Headey            | Endale Kebede        | Robert I. Lerman       |
| Misty Lee Heggeness     | Nico Keilman         | Morgan E. Levine       |
| Arun S. Hendi           | Lisa A. Keister      | Brian Louis Levy       |
| Carrie Henning-Smith    | Blakelee Kemp        | Miao Li                |
| Pamela Herd             | Tate Kihara          | Daniel T. Lichter      |
| Joni Hersch             | Alexandra Achen      | Carolyn A. Liebler     |
| Margaret Hicken         | Killewald            | Mats Lillehagen        |
| Nicole Hiekel           | ChangHwan Kim        | I-Fen Lin              |

|                         |                           |                       |
|-------------------------|---------------------------|-----------------------|
| Laura Lindberg          | Anita Minh                | Carla A. Pfeffer      |
| Elaine M. Liu           | Joya Misra                | Justin R. Pierce      |
| Hui Liu                 | Pablo A. Mitnik           | Janneke Pieters       |
| John Logan              | Trenton D. Mize           | Alejandra Ros Pilarz  |
| Javier López-de-Lacalle | Stefanie Mollborn         | Natasha V. Pilkauskas |
| Qiongshi Lu             | Ellis Monk                | Martin Piotrowski     |
| Ian Lundberg            | James Moody               | Elena Pirani          |
| Liyang Luo              | Ravaris Moore             | Jessica Polos         |
| Ye Luo                  | Elizabeth Ann Moorhouse   | Cristian Pop-Eleches  |
| Torkild Hovde Lyngstad  | Ricardo Mora              | Stavros Poupakis      |
| Mingming Ma             | Stephen L. Morgan         | Daniel A. Powers      |
| Kerry L. D. MacQuarrie  | Zheng Mu                  | Samuel H. Preston     |
| Bo Malmberg             | Peter Muhlau              | Kate C. Prickett      |
| Gunnar Malmberg         | Kathleen J. Mullen        | Irene Prix            |
| Colleen Flaherty        | Chandra Muller            | Beth Prosnitz         |
| Manchester              | Christopher Michael       | Kelly Purtell         |
| Matteo Manfredini       | Muller                    | Zhenchao Qian         |
| Emily S. Mann           | Joanne Sophie Muller      | Natasha Quadlin       |
| Wendy Manning           | Michael J. Murphy         | Adrian E. Raftery     |
| Vida Maralani           | Kelly Musick              | Diego Ramiro Fariñas  |
| Rachel Margolis         | Eleonora Mussino          | Laura Ramos-Jaimes    |
| Michelle Lee Maroto     | Mikko E.V. Myrskylä       | Francesco Rampazzo    |
| Emily Ann Marshall      | Yunju Nam                 | Marcos A. Rangel      |
| Michael E. Martell      | Lenna Nepomnyaschy        | Samantha Benvinda     |
| Molly A. Martin         | Marília R. Nepomuceno     | Rawlings              |
| Gladys M. Martinez      | Daniel Adam Nicholson     | James M. Raymo        |
| Ana Martinez-Donate     | Rense Nieuwenhuis         | Rin Reczek            |
| Ryan Kelly Masters      | Jessica Nisén             | Michael Rendall       |
| Stephen A. Matthews     | Natalie Nitsche           | Chandra A. Reynolds   |
| Anna Matysiak           | Jenna Nobles              | Peter Rich            |
| Fabrizio Mazzonna       | Johannes Norling          | Timothy L. M. Riffe   |
| Haley McAvay            | Paul Norman               | Fernando Riosmena     |
| Leslie McCall           | Heather Avery O'Connell   | Tim Riswick           |
| Christopher McCarty     | Ann Owens                 | Stephanie Robert      |
| David James McCollum    | Sabrina Wulff Pablonia    | Jean-Marie Robine     |
| Mary C. McEniry         | Analisa Packham           | Alexander Roehrkasse  |
| Michael McFarland       | Jeremy Pais               | David Roelfs          |
| Deborah R. McFarlane    | Ipshita Pal               | Leslie Root           |
| Kathleen McKiernan      | Sarah Elizabeth Patterson | Maria Fernanda        |
| Stacey McMorro          | Collin Frederick Payne    | Rosales-Rueda         |
| Nader Mehri             | Juan Manuel Pedroza       | Matthias              |
| Ivan Mejia              | David Pedulla             | Rosenbaum-Feldbrügg   |
| Letizia Mencarini       | Andrew M. Penner          | Michael J. Rosenfeld  |
| Stephanie Spaid Miedema | Kate Pennington           | Wendy Deborah Roth    |
| Julia Mikolaj           | Kristin L. Perkins        | Erin Ruel             |
| Melinda Miller          | Iñaki Permanyer           | Matthew S. Rutledge   |
| Yuka Minagawa           | Amber Peterman            | Rebecca Ryan          |

|                       |                          |                         |
|-----------------------|--------------------------|-------------------------|
| Anna Rybińska         | John Stover              | Daniele Vignoli         |
| Joseph Saenz          | Matthew Strickland       | Andres Villarreal       |
| Jarron M. Saint Onge  | Erich Striessnig         | Trina Vithayathil       |
| Arthur Sakamoto       | Matthias Studer          | Tom Vogl                |
| Viviana Salinas       | Gert Stulp               | Elizabeth Votruba-Drzal |
| Nikola Sander         | Brian J. Stults          | Mike Vuolo              |
| Alexis R. Santos      | J. Bart Stykes           | Sangita Vyas            |
| Sharon Sassler        | Elizabeth Anne Sully     | Sander Wagner           |
| Isaac Sasson          | Larry E. Suter           | Linda Joan Waite        |
| Ariela Schachter      | Calvin Gray Swicegood    | Jane Waldfogel          |
| Jessamyn Schaller     | Bryan L. Sykes           | Maureen R. Waller       |
| Carl P. Schmertmann   | Christopher R. Tamborini | Katrina M. Walsemann    |
| Andreas Schmitz       | Brian Thiede             | Donghui Wang            |
| Robert Schoen         | Mieke Beth Thomeer       | Jia Wang                |
| Robert F. Schoeni     | Maggie Thorsen           | David F. Warner         |
| Bruno Schoumaker      | Valentina Tocchioni      | John R. Warren          |
| Christine Schwartz    | Florencia Torche         | Robert E. Warren        |
| Nathan Seltzer        | Laurent Toulemon         | Brianna Marie Watters   |
| Leigh Senderowicz     | Mircea Trandafir         | Kate Weisshaar          |
| Christie Sennott      | Sam Trejo                | Abigail Weitzman        |
| Sarah Shannon         | Jenny Trinitapoli        | Regina Werum            |
| Rachel M. Shattuck    | Jessica Trounstine       | Michael White           |
| Yifan Shen            | Shripad Tuljapurkar      | Joshua Wilde            |
| Michael Sherris       | Eric Turkheimer          | Lindsey Wilkinson       |
| Xiaoling Shu          | Patrick A. Turley        | Frans Willekens         |
| João Silva            | Zelma Oyarvide Tuthill   | Kristi Williams         |
| Merril Silverstein    | Cody Tuttle              | Nathalie E. Williams    |
| David Simon           | Bryan Clark Tysinger     | Sharifa Williams        |
| David J. G. Slusky    | Jeremy Uecker            | Ben Wilson              |
| Jeffrey Smith         | Ushma D. Upadhyay        | Tanya Wilson            |
| Paul A. Smith         | Hale Utar                | Christopher Wimer       |
| Emily Smith-Greenaway | Raffaele Vacca           | Anne E. Winkler         |
| Tomas Sobotka         | Christine Valente        | Christopher Winship     |
| Anne Solaz            | Jennifer Van Hook        | Alix Soffen Winter      |
| Jieun Song            | Jan van Ours             | Geoffrey T. Wodtke      |
| Xi Song               | Frans van Poppel         | Jaelyn S. Wong          |
| Lucy C. Sorensen      | Alyson A. van Raalte     | Steven H. Woolf         |
| Scott J. South        | Tom VanHeuvelen          | Richard A. Wright       |
| Dean Spears           | Eunice D. Vargas Valle   | Elizabeth Wrigley-Field |
| Russell Spiker        | Alberto L.               | Yu Xie                  |
| Sonja Spitzer         | Velázquez-Estrada        | Dafeng Xu               |
| Gregory D. Squires    | Atheendar Venkataramani  | Huanan Xu               |
| Maria Stanfors        | Ashton Verdery           | Jenjira Yahirun         |
| Guy Stecklov          | Dieter Verhaest          | Firat Yaman             |
| David Steinsaltz      | Victoria Vernon          | Tse-Chuan Yang          |
| Amanda Stevenson      | Sergi Vidal              | Yang Claire Yang        |
| Andrew C. Stokes      | Yana C. Vierboom         | Jill Yavorsky           |

Youngmin Yi  
Jia Yu  
Wei-hsin Yu  
Zhou Yu  
Emma Zang

Xin Zhang  
Zhe Zhang  
Zhenmei Zhang  
Zhuoni Zhang  
Hui Zheng

Xiang Zhou  
Yun Zhou  
Hamidreza Zoraghein
